# Supplementary material for: Oleate Prevents Palmitate-Induced Mitochondrial Dysfunction in Chondrocytes
Source: Frontiers journal article supplement (doi:10.3389/fphys.2021.670753), 2021-06-15
Supplement: Data_Sheet_1.PDF [file Data_Sheet_1.PDF]

## **Oleate prevents palmitate-induced mitochondrial dysfunction in chondrocytes**

Vázquez-Mosquera ME<sup>1</sup>, Fernández-Moreno M<sup>1</sup>, Cortés-Pereira E<sup>1</sup>, Relaño S<sup>1</sup>, Dalmao-Fernández A<sup>1</sup>, Durán-Sotuela A<sup>1</sup>, Ramos-Louro P<sup>1</sup>, Rego-Pérez I<sup>1\*</sup>, Blanco FJ<sup>1\*</sup>

1) Servicio de Reumatología. Instituto de Investigación Biomédica de A Coruña (INIBIC). Complejo Hospitalario Universitario de A Coruña (CHUAC), Sergas. Universidade da Coruña (UDC), Spain.

\* Corresponding authors: Fblagar@sergas.es and Ignacio.rego.perez@sergas.es

**Table S1.** UPL primers and probes of the analyzed genes grouped by their function

| <b>FUNCTION</b> | <b>GENE</b>   | <b>PROTEIN</b>                      | <b>P. SENSE (5'-3')</b><br><b>P.ANTISENSE (5'-3')</b> | <b>UPL<br/>PROBE</b> |
|-----------------|---------------|-------------------------------------|-------------------------------------------------------|----------------------|
| Metabolism      | <b>SLC2A3</b> | Solute carrier family 2<br>member 3 | gggtgtgggtaatactatcttcactg                            | # 31                 |
|                 |               |                                     | cccagtctctccacgttcac                                  |                      |
|                 | <b>HK2</b>    | Hexokinase 2                        | agaagctcccactgggtttt                                  | # 87                 |
|                 |               |                                     | catgagaccaggaaactctcg                                 |                      |
| Reference gene  | <b>RPL13A</b> | Ribosomal protein L13a              | tcagatgtgtctgaggatttctct                              | # 28                 |
|                 |               |                                     | caagcggatgaacaccaac                                   |                      |
|                 |               |                                     | tgtggggcagcatacctc                                    |                      |

**Table S2.** Parameters calculated to assess mitochondrial function from the oxygen consumption rate (OCR) **(a)** and glycolytic function from the extracellular acidification rate (ECAR) **(b)**

**(a)**

| Parameter                            | Description                                                                                                                                                            |
|--------------------------------------|------------------------------------------------------------------------------------------------------------------------------------------------------------------------|
| <b>Basal respiration</b>             | Baseline respiration before addition of compounds                                                                                                                      |
| <b>ATP synthesis</b>                 | <b>Oligomycin</b> -sensitive respiration: basal respiration portion used for ATP production                                                                            |
| <b>Proton leak</b>                   | <b>Oligomycin</b> -insensitive respiration: represents remaining basal respiration not coupled to ATP production                                                       |
| <b>Coupling efficiency</b>           | Ratio of ATP turnover-linked respiration and basal respiration: an indicator of OXPHOS and electron transport chain coupling quality                                   |
| <b>Maximal respiration</b>           | After the addition of an uncoupler ( <b>FCCP</b> ): reflects the maximal capacity of the electron transport chain                                                      |
| <b>Spare respiratory capacity</b>    | Difference between the maximum respiration obtained after the addition of FCCP and basal respiration: indicates the ability of the cell to respond to an energy demand |
| <b>Non-mitochondrial respiration</b> | Rate is also necessary to obtain an accurate measurement of the above parameters. This is represented by the final OCR after the addition of <b>Rot/AntA</b>           |

**(b)**

| Parameter                  | Description                                                                                                                                        |
|----------------------------|----------------------------------------------------------------------------------------------------------------------------------------------------|
| <b>Glycolysis rate</b>     | Represents the process of converting glucose into pyruvate: It is measured as the rate of ECAR reached by the cells after <b>Glucose</b> addition  |
| <b>Glycolytic capacity</b> | Maximum rate of ECAR reached after the addition of <b>Olygomycin</b> that inhibits OXPHOS, forcing the cells to use glycolysis at maximum capacity |
| <b>Glycolytic reserve</b>  | Difference between the maximum glycolytic capacity and glycolysis: indicates the cells' ability to respond to an energy demand                     |

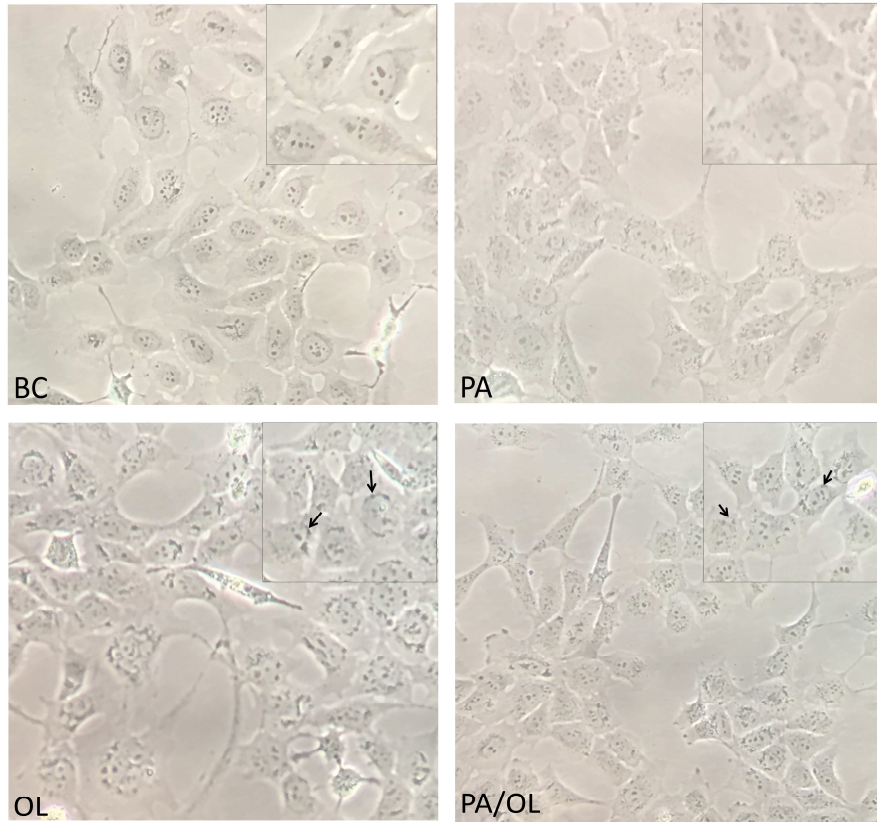

**Figure S1.** Representative images of the structural changes detected in chondrocytes by phase contrast optical microscopy (200x). BC:basal condition; PA: palmitic acid; OL:oleic acid.
